# Supplementary material
Source: publisher figshare collection journal article supplement (https://karger.figshare.com/ndownloader/files/25672022)
Supplement: Supplementary file 1 [file 25672022]

**Supplementary Fig. 1.** Elafin/*PI3* expression is down-regulated in cervical cancer and derived cell lines. A-F. *PI3* mRNA levels are down regulated in cervical carcinoma samples and derived cell lines when compared with normal cervical tissues.
